# Supplementary material for: Curious matrix effects: a computational, electron diffraction, and vibrational spectroscopic study of dysprosium triiodide
Source: Royal Society of Chemistry journal article supplement (doi:10.1039/c001182g), 2010-01-01
Supplement: c001182g.pdf [file c001182g.pdf]

# Curious matrix effects: A computational, electron diffraction, and vibrational spectroscopic study of dysprosium triiodide

Zoltan Varga,<sup>a</sup> Cornelis Petrus Groen,<sup>a,b</sup> Mária Kolonits,<sup>a</sup> and Magdolna Hargittai<sup>a,\*</sup>

*a* Materials Structure and Modeling Research Group of the Hungarian Academy of Sciences, Budapest University of Technology and Economics, P.O.Box 91, 1521 Budapest (Hungary)

*b* Ureenco Nederland B. V., P.O. Box 158, 7600 AD Almelo (The Netherlands)  
Email: hargittaim@mail.bme.hu

## Electronic supplementary information (ESI)

**Table S1** Electron diffraction molecular intensities for DyI<sub>3</sub> at the two camera ranges

Camera range= 19 cm

$s_{\min} = 8.75 \text{ \AA}^{-1}$   $s_{\max} = 27.25 \text{ \AA}^{-1}$  step size =  $0.25 \text{ \AA}^{-1}$

|       |        |        |        |        |        |       |       |
|-------|--------|--------|--------|--------|--------|-------|-------|
|       |        |        | -115.1 | 89.9   | 262.1  | 300.8 | 163.2 |
| 1.1   | -154.2 | -243.7 | -223.9 | -84.8  | 81.3   | 183.3 | 219.8 |
| 135.8 | 16.9   | -126.0 | -187.9 | -185.8 | -49.9  | 47.1  | 146.5 |
| 154.9 | 98.3   | 30.4   | -90.3  | -145.4 | -121.1 | -23.1 | 48.0  |
| 90.0  | 93.5   | 74.6   | 8.4    | -51.1  | -88.1  | -89.1 | -31.9 |
| 11.2  | 54.9   | 92.8   | 59.0   | 20.5   | -28.1  | -83.1 | -76.9 |
| -24.7 | -32.4  | 22.8   | 49.3   | 45.8   | 3.8    | -19.8 | -21.0 |
| -39.7 | -30.4  | -20.3  | -30.1  | 50.2   | -1.3   | 41.8  | -4.1  |
| -19.7 | -49.0  | -33.8  | -30.2  | 7.4    | 16.4   | 18.1  | 10.0  |
| 2.1   | -4.3   | -25.8  | 3.1    | -7.2   | 4.4    |       |       |

Camera range= 50 cm

$s_{\min} = 2.00 \text{ \AA}^{-1}$   $s_{\max} = 14.00 \text{ \AA}^{-1}$  step size =  $0.125 \text{ \AA}^{-1}$

|        |        |        |        |        |        |        |        |
|--------|--------|--------|--------|--------|--------|--------|--------|
| -307.3 | -251.8 | -124.0 | 57.3   | 258.8  | 449.9  | 575.4  | 610.6  |
| 530.5  | 375.0  | 121.7  | -128.5 | -350.0 | -500.9 | -552.5 | -536.2 |
| -449.1 | -305.1 | -151.4 | 13.5   | 156.9  | 264.5  | 354.4  | 426.2  |
| 443.1  | 404.1  | 318.3  | 194.3  | 43.7   | -109.8 | -255.5 | -361.9 |
| -427.8 | -431.2 | -374.1 | -284.1 | -153.2 | -15.1  | 127.6  | 248.1  |
| 343.4  | 372.4  | 381.8  | 332.0  | 236.6  | 144.5  | 28.7   | -102.5 |
| -225.1 | -301.3 | -338.9 | -342.3 | -303.0 | -224.1 | -127.4 | -18.4  |
| 103.6  | 191.7  | 266.9  | 314.1  | 290.5  | 281.0  | 221.9  | 110.9  |
| 11.8   | -89.8  | -164.3 | -232.4 | -263.9 | -272.6 | -257.5 | -184.0 |
| -102.4 | -12.1  | 72.8   | 154.3  | 196.2  | 250.1  | 214.0  | 193.3  |
| 165.5  | 81.7   | 2.8    | -64.2  | -140.0 | -160.4 | -193.6 | -190.4 |
| -194.7 | -126.5 | -64.8  | -25.9  | 43.4   | 91.3   | 132.0  | 156.9  |
| 188.6  |        |        |        |        |        |        |        |

**Table S2** Calculated and experimental harmonic vibrational frequencies ( $\text{cm}^{-1}$ ), with IR intensities ( $\text{km mol}^{-1}$ ) in parentheses for  $\text{Dy}_2\text{I}_6$

| symmetry | mode       | character <sup>a</sup>                          | MP2(FC)(Cundari) | IR (gas) |
|----------|------------|-------------------------------------------------|------------------|----------|
| $A_g$    | $\nu_1$    | $\nu_s$ Dy-I <sub>t</sub>                       | 184.4 (0)        |          |
|          | $\nu_2$    | $\nu_s$ Dy-I <sub>b</sub>                       | 120.7 (0)        |          |
|          | $\nu_3$    | $\beta_s$ I <sub>b</sub> -Dy-I <sub>b</sub>     | 56.5 (0)         |          |
|          | $\nu_4$    | $\beta_s$ I <sub>t</sub> -Dy-I <sub>t</sub>     | 25.8 (0)         |          |
| $A_u$    | $\nu_5$    | $\delta_{as}$ I <sub>t</sub> -Dy-I <sub>t</sub> | 22.1 (0)         |          |
| $B_{1g}$ | $\nu_6$    | $\nu_{as}$ Dy-I <sub>t</sub>                    | 199.9 (0)        |          |
|          | $\nu_7$    | $\beta_{as}$ I <sub>t</sub> -Dy-I <sub>t</sub>  | 23.3 (0)         |          |
| $B_{1u}$ | $\nu_8$    | $\nu_{as}$ Dy-I <sub>b</sub>                    | 144.9 (23)       |          |
|          | $\nu_9$    | $\delta_s$ I <sub>t</sub> -Dy-I <sub>t</sub>    | 24.8 (4)         |          |
| $B_{2g}$ | $\nu_{10}$ | $\nu_{as}$ Dy-I <sub>b</sub>                    | 112.2 (0)        |          |
|          | $\nu_{11}$ | $\delta_{as}$ I <sub>t</sub> -Dy-I <sub>t</sub> | 33.3 (0)         |          |
| $B_{2u}$ | $\nu_{12}$ | $\nu_{as}$ Dy-I <sub>t</sub>                    | 202.1 (86)       |          |
|          | $\nu_{13}$ | ring puckering                                  | 37.7 (0)         |          |
|          | $\nu_{14}$ | $\Theta$ Dy-I <sub>b</sub> -Dy-I <sub>b</sub>   | 3.8 (0)          |          |
| $B_{3g}$ | $\nu_{15}$ | ring twist                                      | 27.5 (0)         |          |
| $B_{3u}$ | $\nu_{16}$ | $\nu_s$ Dy-I <sub>t</sub>                       | 173.8 (86)       | 171      |
|          | $\nu_{17}$ | $\nu_{as}$ Dy-I <sub>b</sub>                    | 114.5 (16)       |          |
|          | $\nu_{18}$ | $\beta_{as}$ I <sub>t</sub> -Dy-I <sub>t</sub>  | 33.9 (1)         |          |

<sup>a</sup> The symbols or abbreviations  $\nu$ ,  $\beta$ ,  $\delta$ ,  $\Theta$ , 's', and 'as' mean stretch, in-plane bend, out-of-plane bend, torsion, symmetric and asymmetric, respectively.

**Table S3** Calculated vibrational frequencies ( $\text{cm}^{-1}$ ) and IR intensities ( $\text{km mol}^{-1}$ ) in parentheses of  $\text{DyI}_3 \cdot \text{Ng}_{a,b}$  ( $\text{Ng} = \text{Ar, Kr, Xe}$ ;  $a$  and  $b = 0, 1, 3$ ) matrices at MP2 (Stuttgart LC) level of theory.<sup>a</sup>

|    | $\text{DyI}_3$ | $\text{DyI}_3 \cdot \text{Ar}_{1,0}$ | $\text{DyI}_3 \cdot \text{Ar}_{1,1}$ | $\text{DyI}_3 \cdot \text{Ar}_{3,0}$ | $\text{DyI}_3 \cdot \text{Ar}_{3,1}$ |
|----|----------------|--------------------------------------|--------------------------------------|--------------------------------------|--------------------------------------|
|    | $D_{3h}$       | $C_{3v}$                             | $D_{3h}$                             | $C_{3v}$                             | $C_{3v}$                             |
| 1  | 26.0 (12)      | 29.8 (0)                             | 29.3 (1)                             | 24.5 (0)                             | 19.0 (0)                             |
| 2  | 35.2 (1)       | 29.8 (0)                             | 29.3 (1)                             | 24.5 (0)                             | 19.0 (0)                             |
| 3  | 35.2 (1)       | 33.8 (9)                             | 39.7 (0)                             | 32.2 (0)                             | 19.5 (4)                             |
| 4  | 142.0 (0)      | 36.8 (0)                             | 39.7 (0)                             | 35.0 (1)                             | 23.3 (1)                             |
| 5  | 199.5 (46)     | 36.8 (0)                             | 41.2 (0)                             | 35.0 (1)                             | 23.3 (1)                             |
| 6  | 199.5 (46)     | 96.1 (6)                             | 41.2 (0)                             | 40.5 (9)                             | 32.9 (0)                             |
| 7  |                | 142.8 (1)                            | 41.3 (12)                            | 47.4 (0)                             | 34.2 (1)                             |
| 8  |                | 197.2 (44)                           | 77.4 (0)                             | 47.4 (0)                             | 34.2 (1)                             |
| 9  |                | 197.2 (44)                           | 84.5 (11)                            | 50.4 (2)                             | 39.7 (9)                             |
| 10 |                |                                      | 139.7 (0)                            | 54.5 (0)                             | 47.1 (0)                             |
| 11 |                |                                      | 195.5 (44)                           | 54.5 (0)                             | 47.1 (0)                             |
| 12 |                |                                      | 195.5 (44)                           | 66.7 (2)                             | 49.0 (0)                             |
| 13 |                |                                      |                                      | 150.2 (6)                            | 54.2 (0)                             |
| 14 |                |                                      |                                      | 191.4 (45)                           | 54.2 (0)                             |
| 15 |                |                                      |                                      | 191.4 (45)                           | 64.9 (1)                             |
| 16 |                |                                      |                                      |                                      | 148.4 (5)                            |
| 17 |                |                                      |                                      |                                      | 191.7 (45)                           |
| 18 |                |                                      |                                      |                                      | 191.7 (45)                           |

<sup>a</sup> Italic style: normal vibrations of  $\text{DyI}_3$  units

**Table S3** continued

|    | Dyl <sub>3</sub><br><i>D</i> <sub>3h</sub> | Dyl <sub>3</sub> .Kr <sub>1,0</sub><br><i>C</i> <sub>3v</sub> | Dyl <sub>3</sub> .Kr <sub>1,1</sub><br><i>D</i> <sub>3h</sub> | Dyl <sub>3</sub> .Kr <sub>3,0</sub><br><i>C</i> <sub>3v</sub> | Dyl <sub>3</sub> .Kr <sub>3,1</sub><br><i>C</i> <sub>3v</sub> |
|----|--------------------------------------------|---------------------------------------------------------------|---------------------------------------------------------------|---------------------------------------------------------------|---------------------------------------------------------------|
| 1  | 26.0 (12)                                  | 24.7 (0)                                                      | 24.1 (0)                                                      | 24.3 (0)                                                      | 16.2 (0)                                                      |
| 2  | 35.2 (1)                                   | 24.7 (0)                                                      | 24.1 (0)                                                      | 24.3 (0)                                                      | 16.2 (0)                                                      |
| 3  | 35.2 (1)                                   | 32.9 (8)                                                      | 34.1 (0)                                                      | 26.9 (0)                                                      | 17.6 (2)                                                      |
| 4  | 142.0 (0)                                  | 36.0 (0)                                                      | 34.1 (0)                                                      | 33.6 (0)                                                      | 24.9 (1)                                                      |
| 5  | 199.5 (46)                                 | 36.0 (0)                                                      | 38.4 (0)                                                      | 33.6 (0)                                                      | 24.9 (1)                                                      |
| 6  | 199.5 (46)                                 | 81.3 (8)                                                      | 38.4 (0)                                                      | 39.8 (5)                                                      | 27.8 (0)                                                      |
| 7  |                                            | 142.5 (2)                                                     | 41.2 (9)                                                      | 40.3 (0)                                                      | 32.4 (1)                                                      |
| 8  |                                            | 196.7 (43)                                                    | 59.6 (0)                                                      | 40.3 (0)                                                      | 32.4 (1)                                                      |
| 9  |                                            | 196.7 (43)                                                    | 74.3 (17)                                                     | 44.2 (5)                                                      | 40.7 (0)                                                      |
| 10 |                                            |                                                               | 139.0 (0)                                                     | 45.3 (0)                                                      | 40.7 (0)                                                      |
| 11 |                                            |                                                               | 194.5 (42)                                                    | 45.3 (0)                                                      | 41.1 (1)                                                      |
| 12 |                                            |                                                               | 194.5 (42)                                                    | 54.4 (6)                                                      | 42.4 (10)                                                     |
| 13 |                                            |                                                               |                                                               | 151.4 (8)                                                     | 45.7 (0)                                                      |
| 14 |                                            |                                                               |                                                               | 189.4 (45)                                                    | 45.7 (0)                                                      |
| 15 |                                            |                                                               |                                                               | 189.4 (45)                                                    | 51.6 (3)                                                      |
| 16 |                                            |                                                               |                                                               |                                                               | 149.3 (7)                                                     |
| 17 |                                            |                                                               |                                                               |                                                               | 189.6 (44)                                                    |
| 18 |                                            |                                                               |                                                               |                                                               | 189.6 (44)                                                    |

**Table S3** continued

|    | Dyl <sub>3</sub><br><i>D</i> <sub>3h</sub> | Dyl <sub>3</sub> .Xe <sub>1,0</sub><br><i>C</i> <sub>3v</sub> | Dyl <sub>3</sub> .Xe <sub>1,1</sub><br><i>D</i> <sub>3h</sub> | Dyl <sub>3</sub> .Xe <sub>3,0</sub><br><i>C</i> <sub>3v</sub> | Dyl <sub>3</sub> .Xe <sub>3,1</sub><br><i>C</i> <sub>3v</sub> |
|----|--------------------------------------------|---------------------------------------------------------------|---------------------------------------------------------------|---------------------------------------------------------------|---------------------------------------------------------------|
| 1  | 26.0 (12)                                  | 22.4 (0)                                                      | 21.1 (1)                                                      | 23.3 (0)                                                      | 13.6 (0)                                                      |
| 2  | 35.2 (1)                                   | 22.4 (0)                                                      | 21.1 (1)                                                      | 23.3 (0)                                                      | 13.6 (0)                                                      |
| 3  | 35.2 (1)                                   | 32.0 (7)                                                      | 32.8 (0)                                                      | 25.0 (0)                                                      | 17.8 (1)                                                      |
| 4  | 142.0 (0)                                  | 35.7 (0)                                                      | 32.8 (0)                                                      | 31.2 (1)                                                      | 24.6 (1)                                                      |
| 5  | 199.5 (46)                                 | 35.7 (0)                                                      | 37.7 (0)                                                      | 31.2 (1)                                                      | 24.6 (1)                                                      |
| 6  | 199.5 (46)                                 | 76.7 (10)                                                     | 37.7 (0)                                                      | 35.4 (0)                                                      | 25.7 (0)                                                      |
| 7  |                                            | 142.4 (2)                                                     | 41.3 (7)                                                      | 38.2 (0)                                                      | 30.3 (1)                                                      |
| 8  |                                            | 195.8 (42)                                                    | 51.1 (0)                                                      | 38.2 (0)                                                      | 30.3 (1)                                                      |
| 9  |                                            | 195.8 (42)                                                    | 71.9 (24)                                                     | 42.6 (0)                                                      | 36.2 (0)                                                      |
| 10 |                                            |                                                               | 137.8 (0)                                                     | 42.6 (0)                                                      | 39.0 (0)                                                      |
| 11 |                                            |                                                               | 192.8 (40)                                                    | 42.6 (2)                                                      | 39.0 (0)                                                      |
| 12 |                                            |                                                               | 192.8 (40)                                                    | 52.4 (8)                                                      | 43.0 (0)                                                      |
| 13 |                                            |                                                               |                                                               | 152.2 (11)                                                    | 43.0 (0)                                                      |
| 14 |                                            |                                                               |                                                               | 186.6 (45)                                                    | 43.1 (5)                                                      |
| 15 |                                            |                                                               |                                                               | 186.6 (45)                                                    | 48.8 (9)                                                      |
| 16 |                                            |                                                               |                                                               |                                                               | 150.5 (10)                                                    |
| 17 |                                            |                                                               |                                                               |                                                               | 186.7 (43)                                                    |
| 18 |                                            |                                                               |                                                               |                                                               | 186.7 (43)                                                    |

**Table S4** Computed geometrical and vibrational parameters, and relative energies of the bending potential of DyI<sub>3</sub> at MP2(FC)(Cundari) level of theory

| I–Dy–I (deg) | <i>r</i> (Å) | $\Delta E$ (cm <sup>-1</sup> ) | frequencies (cm <sup>-1</sup> ) |         |         |         |         |         |
|--------------|--------------|--------------------------------|---------------------------------|---------|---------|---------|---------|---------|
|              |              |                                | $\nu_1$                         | $\nu_2$ | $\nu_3$ | $\nu_4$ | $\nu_5$ | $\nu_6$ |
| 120.0        | 2.826        | 0.0                            | 142.1                           | 25.0    | 201.6   | 201.6   | 35.3    | 35.3    |
| 119.0        | 2.824        | 88.5                           | 144.1                           | 26.5    | 201.2   | 201.2   | 35.5    | 35.5    |
| 117.5        | 2.822        | 233.2                          | 147.1                           | 28.7    | 200.4   | 200.4   | 36.0    | 35.8    |
| 115.0        | 2.819        | 508.3                          | 151.7                           | 32.4    | 198.9   | 198.8   | 37.0    | 36.8    |
| 112.5        | 2.816        | 832.7                          | 156.3                           | 35.5    | 197.2   | 197.1   | 38.2    | 38.0    |
| 110.0        | 2.813        | 1210.4                         | 160.7                           | 38.6    | 195.6   | 195.4   | 39.5    | 39.4    |
| 105.0        | 2.809        | 2155.7                         | 168.8                           | 44.8    | 191.5   | 191.4   | 42.9    | 42.9    |
| 100.0        | 2.808        | 3418.9                         | 175.8                           | 52.2    | 186.4   | 186.4   | 47.5    | 47.5    |
| 90.0         | 2.816        | 7361.4                         | 185.0                           | 72.9    | 172.1   | 172.1   | 60.7    | 60.7    |
